# Supplementary material for: How Molecular Competition Influences Fluxes in Gene Expression Networks
Source: PLoS One. 2011 Dec 5;6(12):e28494. doi: 10.1371/journal.pone.0028494 (PMC3230629; doi:10.1371/journal.pone.0028494)
Supplement: Text S1 — Derivation of equations (2 )-(4). (DOC) [file pone.0028494.s001.doc]

The simplified model illustrated in Figure 3 with 2 competitors *c1* and *c2*, competing for a ‘target’ *t*, is easily extended to *n* competitors. In the binding steps (with rates *αi*) the competitors form a complex with the target. In the release steps (with rates *i*) product (*pi*) is generated and competitors and target are released.

The following expression for the internal response coefficient is used:

, (1)

where *nik* is the stoichiometric coefficient of moiety *k* occuring in cycle *i*.

Conservation relations:

,

,

,

…

.

Applying equation (1) gives for the response of the steady-state flux *Ji* of competitor *i* to changes in the various internal variables:

,

,

,

…

.

,

,

…

.

Then we calculate the following sum:

,

,

(13)

To rewrite these equations we will use the generalized flux connectivity theorem (equation 19 in [20]):

,

which sums over all rates *vi* that are directly affected by a change in the internal metabolite *Sk*.

Assuming furthermore that the rates depend proportionally on their respective substrate concentrations (mass-action kinetics, all elasticity coefficients ** towards a substrate of the reaction are 1) the following is derived:

,

,

,

…

.

,

,

…

Then we calculate the following sum:

,

The elasticities can then be calculated based on the proposed rate equations (Figure 3B). The rate equations for competitor *i* read:

,

.

With the elasticity defined as (*cf.* Methods), we can derive:

,

.

Therefore:

(14)

This relationship equates to 1 according to the summation theorem of metabolic control analysis.

Then equation (13) and (14) lead to an expression for the response coefficient for flux *Ji* with respect to the target concentration in terms of the response coefficients of this flux to the total competitor levels and their bound fractions:

. (15)

A similar procedure for the following sum:

,

with

(proof in Text S1),

leads to:

, (3)

which is an expression for the response coefficient for flux *Ji* with respect to competitor *i* in terms of the response coefficient of this flux to the total target level and the fraction of total target bound to that competitor.

And for the following sum: (*i≠k*)

with (proof in Text S1)

leads to:

, (4)

which is an expression for the response coefficient for flux *Ji* with respect to competitor *k* in terms of the response coefficient of this flux to the total target level and the fraction of total target bound to competitor *k*.

Using the expressions (3) and (4), we can then solve equation (15) for the response coefficient of the flux to the total concentration of target:

(2)
